# Supplementary material for: RSM–GA Based Optimization of Bacterial PHA Production and In Silico Modulation of Citrate Synthase for Enhancing PHA Production
Source: PubMed Central journal article supplement (PMC6995514; doi:10.3390/biom9120872), 2019-12-12
Supplement: biomolecules-09-00872-s001.pdf [file biomolecules-09-00872-s001.pdf]

## Supplementary Information

Table SII. List of PubChem compounds used as inhibitors in the present study

| S. No. | CID ID  | IUPAC NAME                                                | STRUCTURE                                                                            | MOLECULAR WEIGHT | BINDING SCORE |
|--------|---------|-----------------------------------------------------------|--------------------------------------------------------------------------------------|------------------|---------------|
| 1.     | 5284344 | (E)-1-[(2S)-2-amino-2-carboxyethoxy]-2-diazonioethenolate | 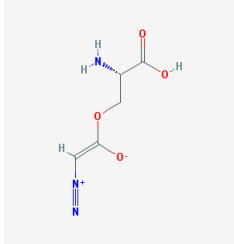  | 173.128 g/mol    | -5.6          |
| 2.     | 2603    | 2-[(3-chlorophenyl)hydrazinylidene]propanedinitrile       |   | 204.617 g/mol    | -5.9          |
| 3.     | 10868   | N,N'-dicyclohexylmethanediimine                           |  | 206.333 g/mol    | -5.7          |

|    |               |                                         |                                                                                       |               |      |
|----|---------------|-----------------------------------------|---------------------------------------------------------------------------------------|---------------|------|
| 4. | 3120          | 3-(3,4-dichlorophenyl)-1,1-dimethylurea | 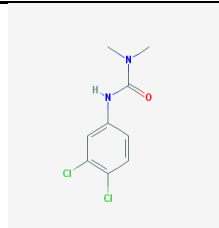   | 233.092 g/mol | -5.3 |
| 5. | 6137          | L-methionine                            |    | 149.208 g/mol | -4.9 |
| 6. | 6306          | L-isoleucine                            |    | 131.175 g/mol | -5.0 |
| 7. | 12969119<br>2 | 2-fluoroacetic acid;hydrate             |   | 96.057 g/mol  | -4.0 |
| 8. | 784           | hydrogen peroxide                       |  | 34.014 g/mol  | -2.9 |

|     |        |                                                 |                                                                                       |               |      |
|-----|--------|-------------------------------------------------|---------------------------------------------------------------------------------------|---------------|------|
| 9.  | 10917  | (3R)-3-hydroxy-4-(trimethylazaniumyl)butanoate  | 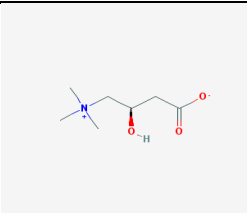   | 161.201 g/mol | -4.9 |
| 10. | 586    | 2-[carbamimidoyl(methyl)amino]acetic acid       |    | 131.135 g/mol | -5.4 |
| 11. | 4649   | 4-amino-2-hydroxybenzoic acid                   |    | 153.137 g/mol | -5.9 |
| 12. | 222289 | 2,3-dibromo-3-phenylprop-2-enoic acid           |   | 305.953 g/mol | -7.4 |
| 13. | 6224   | trisodium;2-hydroxypropane-1,2,3-tricarboxylate |  | 258.068 g/mol | -6.9 |

|     |       |                                                                                       |                                                                                      |               |      |
|-----|-------|---------------------------------------------------------------------------------------|--------------------------------------------------------------------------------------|---------------|------|
| 14. | 60960 | (2R)-2-amino-3-sulfanylpropanoic acid;hydrochloride                                   | 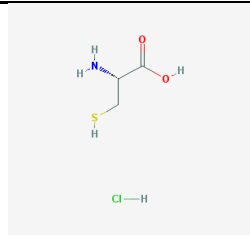  | 157.612 g/mol | -4.4 |
| 15. | 6322  | L-arginine                                                                            |   | 174.204 g/mol | -5.8 |
| 16. | 5781  | 1,3-diazinane-2,4,5,6-tetrone                                                         |   | 142.07 g/mol  | -5.5 |
| 17. | 1130  | 2-[3-[(4-amino-2-methylpyrimidin-5-yl)methyl]-4-methyl-1,3-thiazol-3-ium-5-yl]ethanol |  | 265.355 g/mol | -6.5 |

|     |        |                                                                                    |                                                                                      |               |      |
|-----|--------|------------------------------------------------------------------------------------|--------------------------------------------------------------------------------------|---------------|------|
| 18. | 493570 | 7,8-dimethyl-10-[(2S,3S,4R)-2,3,4,5-tetrahydroxypentyl]benzo[g]pteridine-2,4-dione | 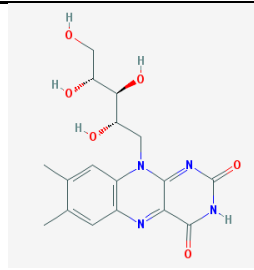  | 376.369 g/mol | -9.2 |
| 19. | 938    | pyridine-3-carboxylic acid                                                         |   | 123.111 g/mol | -5.0 |
| 20. | 864    | 5-(dithiolan-3-yl)pentanoic acid                                                   |   | 206.318 g/mol | -5.5 |
| 21. | 6613   | 3-[[[(2R)-2,4-dihydroxy-3,3-dimethylbutanoyl]amino]propanoic acid                  |  | 219.237 g/mol | -6.0 |

|     |          |                                                                                                                                                       |                                                                                      |               |      |
|-----|----------|-------------------------------------------------------------------------------------------------------------------------------------------------------|--------------------------------------------------------------------------------------|---------------|------|
| 22. | 445354   | (2E,4E,6E,8E)-3,7-dimethyl-9-(2,6,6-trimethylcyclohexen-1-yl)nona-2,4,6,8-tetraen-1-ol                                                                | 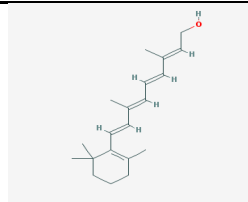  | 286.459 g/mol | -6.7 |
| 23. | 14985    | (2R)-2,5,7,8-tetramethyl-2-[(4R,8R)-4,8,12-trimethyltridecyl]-3,4-dihydrochromen-6-ol                                                                 |   | 430.717 g/mol | -7.9 |
| 24. | 54670067 | (2R)-2-[(1S)-1,2-dihydroxyethyl]-3,4-dihydroxy-2H-furan-5-one                                                                                         |   | 176.124 g/mol | -6.4 |
| 25. | 31703    | (7S,9S)-7-[(2R,4S,5S,6S)-4-amino-5-hydroxy-6-methyloxan-2-yl]oxy-6,9,11-trihydroxy-9-(2-hydroxyacetyl)-4-methoxy-8,10-dihydro-7H-tetracene-5,12-dione |  | 543.525 g/mol | -9.6 |

|     |         |                                                                                                                                                                                                                                                   |                                                                                      |               |      |
|-----|---------|---------------------------------------------------------------------------------------------------------------------------------------------------------------------------------------------------------------------------------------------------|--------------------------------------------------------------------------------------|---------------|------|
| 26. | 439501  | 3-[(1R,3S,5S,8R,9S,10R,11R,13R,14S,17R)-1,5,11,14-tetrahydroxy-10-(hydroxymethyl)-13-methyl-3-[(2R,3R,4R,5R,6S)-3,4,5-trihydroxy-6-methyloxan-2-yl]oxy-2,3,4,6,7,8,9,11,12,15,16,17-dodecahydro-1H-cyclopenta[a]phenanthren-17-yl]-2H-furan-5-one | 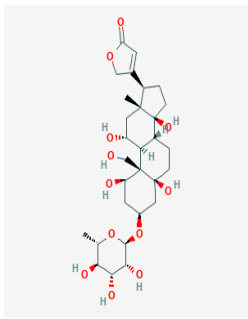  | 584.659 g/mol | -9.5 |
| 27. | 6758    | (2R,6aS,12aS)-1,2,6,6a,12,12a-hexahydro-2-isopropenyl-8,9-dimethoxychromeno[3,4-b]furo(2,3-h)chromen-6-one                                                                                                                                        |   | 394.423 g/mol | -9.0 |
| 28. | 5324346 | 2-[(E)-[5-methoxy-1-[4-(trifluoromethyl)phenyl]pentylidene]amino]oxyethanamine                                                                                                                                                                    |  | 318.34 g/mol  | -7.2 |

|     |        |                                                                                         |                                                                                      |               |      |
|-----|--------|-----------------------------------------------------------------------------------------|--------------------------------------------------------------------------------------|---------------|------|
| 29. | 124886 | L-gamma-glutamyl-L-cysteinyl-glycine                                                    | 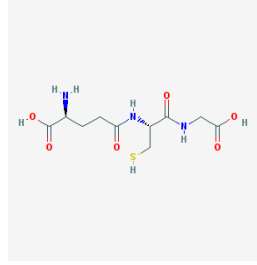  | 307.321 g/mol | -7.0 |
| 30. | 6037   | (2S)-2-[[4-[(2-amino-4-oxo-1H-pteridin-6-yl)methylamino]benzoyl]amino]pentanedioic acid |   | 441.404 g/mol | -9.6 |
| 31. | 1183   | 4-hydroxy-3-methoxybenzaldehyde                                                         |   | 152.149 g/mol | -5.3 |
| 32. | 171548 | 5-[(3aS,4S,6aR)-2-oxo-1,3,3a,4,6,6a-hexahydrothieno[3,4-d]imidazol-4-yl]pentanoic acid  |  | 244.309 g/mol | -6.7 |



|     |         |                                                                                                                                                        |                                                                                      |               |              |
|-----|---------|--------------------------------------------------------------------------------------------------------------------------------------------------------|--------------------------------------------------------------------------------------|---------------|--------------|
| 33. | 6019    | 4,5-bis(hydroxymethyl)-2-methylpyridin-3-ol;hydrochloride                                                                                              | 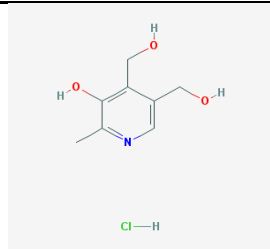  | 205.638 g/mol | -5.8         |
| 34. | 7045767 | (3R)-3-acetyloxy-4-(trimethylazaniumyl)butanoate                                                                                                       |   | 203.238 g/mol | -5.3         |
| 35. | 9750    | (2S)-2-amino-5-(carbamoylamino)pentanoic acid                                                                                                          |   | 175.188 g/mol | -5.4         |
| 36. | 10621   | (2S)-5-hydroxy-2-(3-hydroxy-4-methoxyphenyl)-7-[[[(2R,3R,4R,5R,6S)-3,4,5-trihydroxy-6-methyloxan-2-yl]oxymethyl]oxan-2-yl]oxy-2,3-dihydrochromen-4-one |  | 610.565 g/mol | <b>-11.4</b> |

|     |        |                                                                                               |                                                                                      |               |      |
|-----|--------|-----------------------------------------------------------------------------------------------|--------------------------------------------------------------------------------------|---------------|------|
| 37. | 637775 | (E)-3-(4-hydroxy-3,5-dimethoxyphenyl)prop-2-enoic acid                                        | 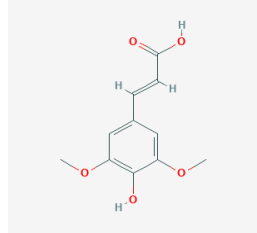  | 224.212 g/mol | -6.6 |
| 38. | 2247   | 1-[(4-fluorophenyl)methyl]-N-[1-[2-(4-methoxyphenyl)ethyl]piperidin-4-yl]benzimidazol-2-amine |   | 458.581 g/mol | -8.7 |
| 39. | 1024   | 4,5-dioxo-1H-pyrrolo[2,3-f]quinoline-2,7,9-tricarboxylic acid                                 |   | 330.208 g/mol | -8.6 |
| 40. | 673    | 2-(dimethylamino)acetic acid                                                                  |  | 103.121 g/mol | -4.3 |

|     |          |                                                                                                                                                           |                                                                                       |               |       |
|-----|----------|-----------------------------------------------------------------------------------------------------------------------------------------------------------|---------------------------------------------------------------------------------------|---------------|-------|
| 41. | 5280804  | 2-(3,4-dihydroxyphenyl)-5,7-dihydroxy-3-[(2S,3R,4S,5S,6R)-3,4,5-trihydroxy-6-(hydroxymethyl)oxan-2-yl]oxychromen-4-one                                    | 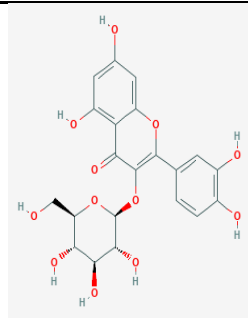   | 464.379 g/mol | -10.5 |
| 42. | 5280795  | (1S,3Z)-3-[(2E)-2-[(1R,3aS,7aR)-7a-methyl-1-[(2R)-6-methylheptan-2-yl]-2,3,3a,5,6,7-hexahydro-1H-inden-4-ylidene]ethylidene]-4-methylidenecyclohexan-1-ol |    | 384.648 g/mol | -7.4  |
| 43. | 5280483  | 2-methyl-3-[(E)-3,7,11,15-tetramethylhexadec-2-enyl]naphthalene-1,4-dione                                                                                 |   | 450.707 g/mol | -8.7  |
| 44. | 11183027 | 2,3-dimethoxy-5-methylbenzene-1,4-diol                                                                                                                    |  | 184.191 g/mol | -5.6  |

|     |        |                                                                                                                                                                                         |                                                                                      |               |       |
|-----|--------|-----------------------------------------------------------------------------------------------------------------------------------------------------------------------------------------|--------------------------------------------------------------------------------------|---------------|-------|
| 45. | 689043 | (E)-3-(3,4-dihydroxyphenyl)prop-2-enoic acid                                                                                                                                            | 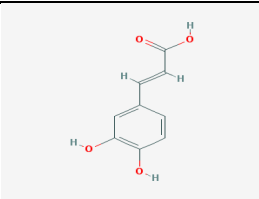  | 180.159 g/mol | -6.3  |
| 46. | 9064   | (2R,3S)-2-(3,4-dihydroxyphenyl)-3,4-dihydro-2H-chromene-3,5,7-triol                                                                                                                     |   | 290.271 g/mol | -8.4  |
| 47. | 442428 | (2S)-7-[(2S,3R,4S,5S,6R)-4,5-dihydroxy-6-(hydroxymethyl)-3-[(2S,3R,4R,5R,6S)-3,4,5-trihydroxy-6-methyloxan-2-yl]oxyoxan-2-yl]oxy-5-hydroxy-2-(4-hydroxyphenyl)-2,3-dihydrochromen-4-one |  | 580.539 g/mol | -10.5 |

|     |          |                                                                                                                                                                                                       |                                                                                      |               |       |
|-----|----------|-------------------------------------------------------------------------------------------------------------------------------------------------------------------------------------------------------|--------------------------------------------------------------------------------------|---------------|-------|
| 48. | 83489    | (2S)-2-(3,4-dihydroxyphenyl)-5-hydroxy-7-<br>[(2S,3R,4S,5S,6R)-3,4,5-trihydroxy-6-<br>[[[(2R,3R,4R,5R,6S)-3,4,5-trihydroxy-6-<br>methyloxan-2-yl]oxymethyl]oxan-2-yl]oxy-2,3-<br>dihydrochromen-4-one | 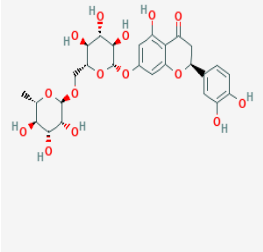  | 596.538 g/mol | -11.0 |
| 49. | 11250133 | (2R,3S)-2-(3,4-dihydroxyphenyl)-8-[(2R,3R,4R)-2-(3,4-dihydroxyphenyl)-3,5,7-trihydroxy-3,4-dihydro-2H-chromen-4-yl]-3,4-dihydro-2H-chromene-3,5,7-triol                                               |   | 578.526 g/mol | -11.2 |
| 50. | 1794427  | (1S,3R,4R,5R)-3-[(E)-3-(3,4-dihydroxyphenyl)prop-2-enoyl]oxy-1,4,5-trihydroxycyclohexane-1-carboxylic acid                                                                                            |  | 354.311 g/mol | -9.1  |

|     |        |                                                                |                                                                                     |               |      |
|-----|--------|----------------------------------------------------------------|-------------------------------------------------------------------------------------|---------------|------|
| 51. | 164544 | 2-(4-hydroxy-3-methoxyphenyl)chromenylium-3,5,7-triol;chloride | 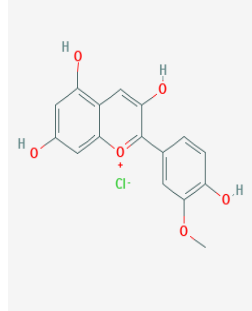 | 336.724 g/mol | -8.3 |
|-----|--------|----------------------------------------------------------------|-------------------------------------------------------------------------------------|---------------|------|
